# Supplementary material
Source: PubMed Central journal article supplement (PMC4286169)
Supplement: NIHMS61189-supplement-1.pdf [file NIHMS61189-supplement-1.pdf]

**SUPPLEMENTAL MATERIAL**

**Supplemental Table I:** Causative subtypes by adjudicators and readjudicators. The numbers indicate number of stroke cases evaluated.

|                    |              | <b>Readjudicator</b> |            |            |           |              |
|--------------------|--------------|----------------------|------------|------------|-----------|--------------|
|                    |              | LAA                  | CE         | SAO        | Other     | Undetermined |
| <b>Adjudicator</b> | LAA          | <b>186</b>           | 9          | 3          | 1         | 39           |
|                    | CE           | 4                    | <b>296</b> | 7          | 2         | 31           |
|                    | SAO          | 6                    | 8          | <b>125</b> | 3         | 62           |
|                    | Other        | 1                    | 0          | 2          | <b>56</b> | 10           |
|                    | Undetermined | 23                   | 36         | 40         | 13        | <b>546</b>   |

**Supplemental Table II:** Phenotypic subtypes by adjudicators and readjudicators. The numbers indicate number of stroke cases evaluated.

|                    |              | <b>Readjudicator</b> |            |            |             |              |
|--------------------|--------------|----------------------|------------|------------|-------------|--------------|
|                    |              | LAA-major            | CE-major   | LI-major   | Other-major | Undetermined |
| <b>Adjudicator</b> | LAA-major    | <b>177</b>           | 4          | 1          | 1           | 36           |
|                    | CE-major     | 4                    | <b>307</b> | 4          | 1           | 26           |
|                    | LI-major     | 5                    | 3          | <b>108</b> | 3           | 56           |
|                    | Other-major  | 1                    | 0          | 2          | <b>51</b>   | 12           |
|                    | Undetermined | 28                   | 45         | 40         | 15          | <b>579</b>   |

### Supplemental figure I:

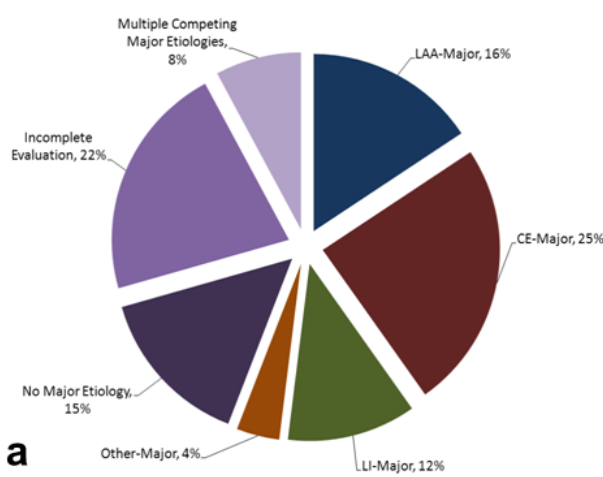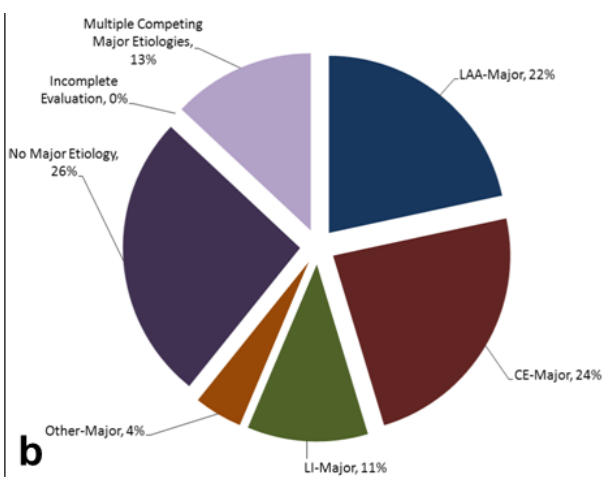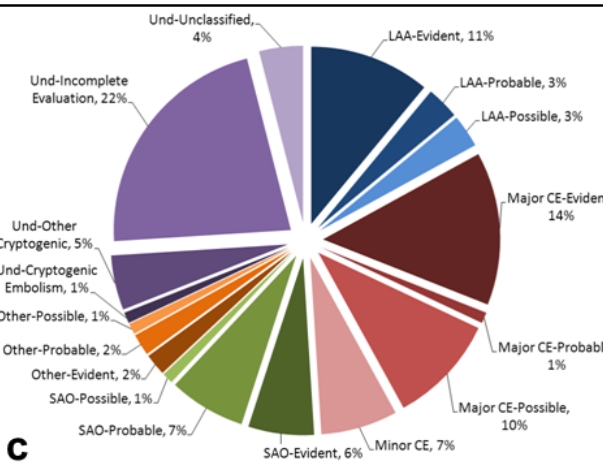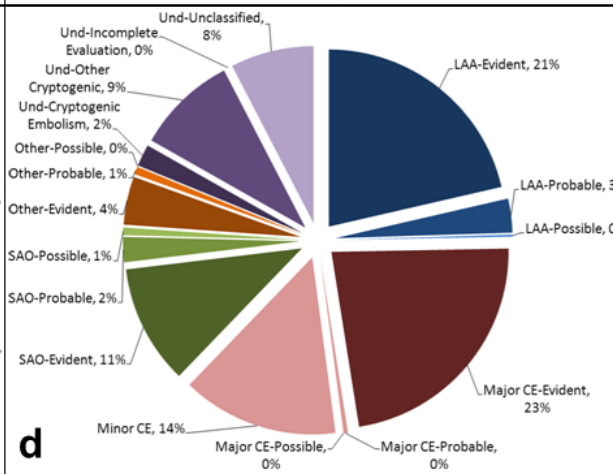

Supplemental Figure II:

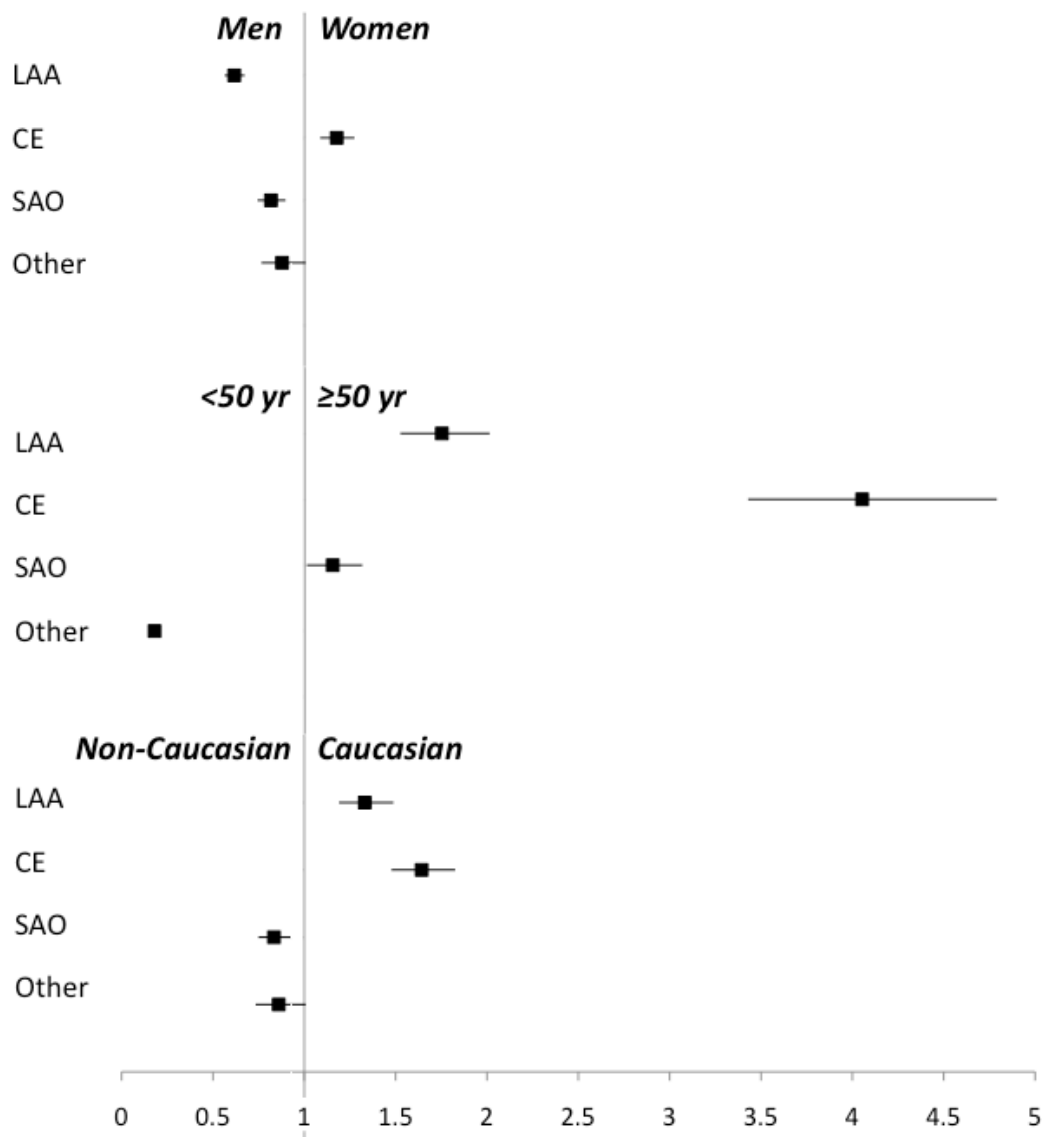

Supplemental Figure III:

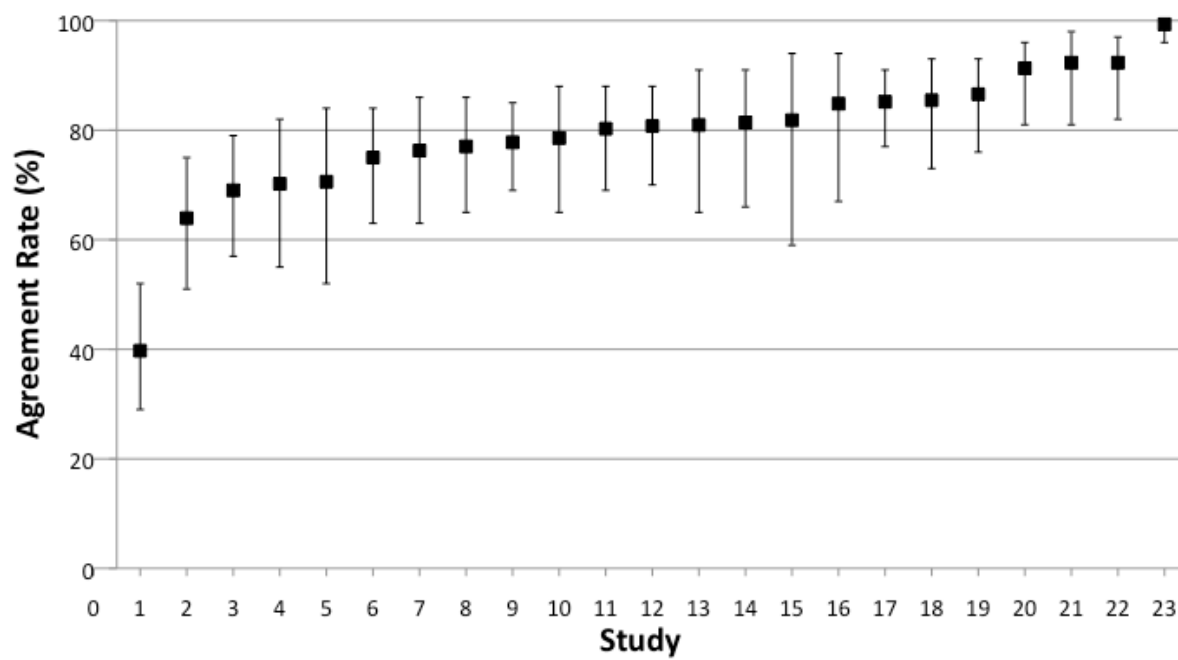

**Supplemental Figure Legends:**

**Supplemental figure I:** Distribution of causative and phenotypic stroke subtypes in studies with unselected populations: 1(a), phenotypic subtypes in the entire population; 1(b), phenotypic subtypes in the subset with complete vascular and cardiac investigation; 1(c), causative subtypes in the entire population; 1(d), causative subtypes in the subset with complete vascular and cardiac investigation. Und: undetermined

**Supplemental figure II:** Association between causative stroke subtypes and patient characteristics. Multinomial logistic regression was used to calculate odds ratios and 95% CI with the “Undetermined” group as the reference category.

**Supplemental figure III:** Crude agreement rates for causative classification between adjudicators and readjudications across the contributing studies.
